# Supplementary material for: Efficacy of Guizhi Fuling Wan for primary dysmenorrhea: protocol for a randomized controlled trial
Source: PubMed Central journal article supplement (PMC8684114; doi:10.1186/s13063-021-05834-0), 2021-12-18
Supplement: 13063_2021_5834_MOESM1_ESM.pdf [file 13063_2021_5834_MOESM1_ESM.pdf]

| <b>Table2   Trial registration data</b>       |                                                                                                                                                                                                                                                                                        |
|-----------------------------------------------|----------------------------------------------------------------------------------------------------------------------------------------------------------------------------------------------------------------------------------------------------------------------------------------|
| <b>Data category</b>                          | <b>Information</b>                                                                                                                                                                                                                                                                     |
| Primary registry and trial identifying number | ChiCTR2000034118                                                                                                                                                                                                                                                                       |
| Date of registration in primary registry      | 25 June 2020                                                                                                                                                                                                                                                                           |
| Secondary identifying numbers                 | ChiMCTR2000003429                                                                                                                                                                                                                                                                      |
| Source(s) of monetary or material support     | National Natural Science Foundation of China (No. 81973897)                                                                                                                                                                                                                            |
| Primary sponsor                               | The Second People's Hospital of Yichang                                                                                                                                                                                                                                                |
| Secondary sponsor(s)                          | /                                                                                                                                                                                                                                                                                      |
| Contact for public queries                    | Chenjje Li                                                                                                                                                                                                                                                                             |
| Contact for scientific queries                | Chenjje Li The Second People's Hospital of Yichang, Hubei, China                                                                                                                                                                                                                       |
| Public title                                  | Efficacy of Guizhi Fuling Wan for Primary dysmenorrhea                                                                                                                                                                                                                                 |
| Scientific title                              | Efficacy of Guizhi Fuling Wan for Primary dysmenorrhea: protocol for a randomised controlled trial                                                                                                                                                                                     |
| Countries of recruitment                      | China                                                                                                                                                                                                                                                                                  |
| Health condition(s) or problem(s) studied     | Guizhi Fuling Wan, Primary dysmenorrhea                                                                                                                                                                                                                                                |
| Intervention(s)                               | Treatment group: GFW (60g GFW per day)<br>Control group: Maiya (60g Maiya per day)                                                                                                                                                                                                     |
| Key inclusion and exclusion criteria          | Inclusion criteria: nulliparous women of 16 to 30 years old, meet the diagnostic criteria of PD by Chinese Obstetrics And Gynecology (3rd edition) . . .<br>Exclusion criteria: unable to complete or comply with the study. . .<br>Age minimum:16<br>Age maximum:30<br>Gender: Female |
| Study type                                    | Interventional<br>Allocation: randomized; Intervention model: parallel assignment; Masking: double blind . . .<br>Primary purpose: verification<br>Phase:0                                                                                                                             |
| Date of first enrolment                       | September 2020                                                                                                                                                                                                                                                                         |
| Target sample size                            | 128                                                                                                                                                                                                                                                                                    |
| Recruitment status                            | Recruiting                                                                                                                                                                                                                                                                             |
| Primary outcome(s)                            | visual analog scale (VAS) scores                                                                                                                                                                                                                                                       |
| Key secondary outcomes                        | The TCM syndrome score, Cox Menstrual Symptom Scale (CMSS), Self-rating Depression Scale (SDS), Self-rating Anxiety Scale(SAS)                                                                                                                                                         |
