# Supplementary material for: Efficacy of Guizhi Fuling Wan for primary dysmenorrhea: protocol for a randomized controlled trial
Source: PubMed Central journal article supplement (PMC8684114; doi:10.1186/s13063-021-05834-0), 2021-12-18
Supplement: 13063_2021_5834_MOESM4_ESM.pdf [file 13063_2021_5834_MOESM4_ESM.pdf]

# Ethical Approval Document

文件编号: 202001  
 版本日期: 2020-5-26

宜昌市第二人民医院临床试验伦理委员会

## 科研立项项目伦理审查申请

|                                                                                                                                                                                                                                                                                                                                                                                                                                  |                                                                                                                                                                                                                                                |         |                                 |
|----------------------------------------------------------------------------------------------------------------------------------------------------------------------------------------------------------------------------------------------------------------------------------------------------------------------------------------------------------------------------------------------------------------------------------|------------------------------------------------------------------------------------------------------------------------------------------------------------------------------------------------------------------------------------------------|---------|---------------------------------|
| 项目名称                                                                                                                                                                                                                                                                                                                                                                                                                             | 新制桂枝茯苓丸治疗热灼血瘀型原发性痛经的随机对照研究                                                                                                                                                                                                                     |         |                                 |
| 研究性质                                                                                                                                                                                                                                                                                                                                                                                                                             | <input type="checkbox"/> 纵向科研项目<br><input type="checkbox"/> 国家级 <input type="checkbox"/> 省级 <input type="checkbox"/> 市级 <input type="checkbox"/> 其他<br>批文批准号:<br><input checked="" type="checkbox"/> 横向科研项目<br><input type="checkbox"/> 自选科研项目 |         |                                 |
| 研究类型                                                                                                                                                                                                                                                                                                                                                                                                                             | <input checked="" type="checkbox"/> 主持<br><input type="checkbox"/> 协作:<br>主持单位名称:<br>主持单位伦理批件号及日期: 2020001 2020.06.05                                                                                                                          |         |                                 |
| 研究目的                                                                                                                                                                                                                                                                                                                                                                                                                             | 新制桂枝茯苓丸治疗热灼血瘀型原发性痛经的随机对照研究                                                                                                                                                                                                                     |         |                                 |
| 本中心研究科室<br>/项目负责人、职称                                                                                                                                                                                                                                                                                                                                                                                                             | 李晨劼, 医师                                                                                                                                                                                                                                        | 联系电话/邮箱 | 13085157861<br>179073543@qq.com |
| 研究计划总例数<br>/本中心承担例数                                                                                                                                                                                                                                                                                                                                                                                                              | 128/128                                                                                                                                                                                                                                        | 研究期限    | 2020年9月12日至2022年<br>12月31日      |
| 一、研究设计类型:<br>1. 是否为试验性研究: <input checked="" type="checkbox"/> 是 <input type="checkbox"/> 否<br>2. 是否为观察性研究: <input checked="" type="checkbox"/> 是 ( <input type="checkbox"/> 回顾性分析 <input checked="" type="checkbox"/> 前瞻性研究) <input type="checkbox"/> 否                                                                                                                                                                          |                                                                                                                                                                                                                                                |         |                                 |
| 二、研究信息<br>1. 资金来源: <input type="checkbox"/> 企业 <input checked="" type="checkbox"/> 政府 <input type="checkbox"/> 学术团体 <input type="checkbox"/> 本单位 <input type="checkbox"/> 自筹<br>2. 研究是否需要使用人体生物标本: <input checked="" type="checkbox"/> 是 ( <input checked="" type="checkbox"/> 采集粪便 <input type="checkbox"/> 利用以往保存的生物标本)<br><input type="checkbox"/> 否<br>3. 受试者可能出现的不良反应 (如有, 请附说明)<br>请见附件 1 说明<br>4. 对不良事件的相应防治措施 (如有, 请附说明) |                                                                                                                                                                                                                                                |         |                                 |

|                                                                                                                                                                                                                                                                                                                                                                                                             |                                                                                                                                                                                                                                                |
|-------------------------------------------------------------------------------------------------------------------------------------------------------------------------------------------------------------------------------------------------------------------------------------------------------------------------------------------------------------------------------------------------------------|------------------------------------------------------------------------------------------------------------------------------------------------------------------------------------------------------------------------------------------------|
| 请见附件 1 说明<br>5. 受试者可能的风险及受益 (如有, 请附说明)<br>请见附件 2 说明                                                                                                                                                                                                                                                                                                                                                         |                                                                                                                                                                                                                                                |
| 三、知情同意书信息<br>1. 知情同意书: <input checked="" type="checkbox"/> 有 <input type="checkbox"/> 无<br>2. 免除知情同意申请:<br><input type="checkbox"/> 利用以往临床诊疗中获得的病历/生物标本的研究<br><input type="checkbox"/> 研究病历/生物标本的二次利用                                                                                                                                                                                                       |                                                                                                                                                                                                                                                |
| 四、招募过程<br>1. 招募方式: <input type="checkbox"/> 广告 <input type="checkbox"/> 个人联系 <input type="checkbox"/> 数据库 <input type="checkbox"/> 中介 <input checked="" type="checkbox"/> 其他<br>2. 招募人群特征: <input type="checkbox"/> 健康者 <input checked="" type="checkbox"/> 患者 <input type="checkbox"/> 弱势群体 <input type="checkbox"/> 孕妇<br>3. 是否支付受试者交通费: <input type="checkbox"/> 是 <input checked="" type="checkbox"/> 否 |                                                                                                                                                                                                                                                |
| 五、提交的材料 (请注明科研项目、知情同意书版本号 and 版本日期)<br>1. 研究方案(V1.0/2019 年 5 月 12 日)<br>2. 知情同意书(V1.0/2019 年 5 月 12 日)<br>3. 病例报告表(V1.0/2019 年 5 月 12 日)                                                                                                                                                                                                                                                                    |                                                                                                                                                                                                                                                |
| 项目负责人声明:<br>我证实本人与该研究项目不存在利益冲突, 由我签名的这份研究申请报告的各项资料已由我检查审阅, 并保证在临床研究实施过程中所有信息是真实的、准确的并符合科研项目要求及国家相关法律法规的要求。                                                                                                                                                                                                                                                                                                  |                                                                                                                                                                                                                                                |
| 项目负责人<br>签名/日期                                                                                                                                                                                                                                                                                                                                                                                              | 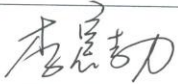<br>2020 年 6 月 5 日                                                                                                                                          |
| 伦理委员会<br>审查意见                                                                                                                                                                                                                                                                                                                                                                                               | 经审查该项目, 是/否违反伦理道德, 同意/不同意其开展该项目。<br><br>伦理委员会签字<br> (盖章) 2020 年 6 月 5 日 |
